# Supplementary material for: Presentation of newly diagnosed type 1 diabetes in children and young people during COVID-19: a national UK survey
Source: PubMed Central journal article supplement — BMJ Paediatr Open. 2020 Nov 2;4(1):e000884. doi: 10.1136/bmjpo-2020-000884 (PMC7607512; doi:10.1136/bmjpo-2020-000884), 2020-11-02
Supplement: bmjpo-2020-000884.draft_revisions.pdf [file bmjpo-2020-000884.draft_revisions.pdf]

# BMJ Paediatrics Open

BMJ Paediatrics Open is committed to open peer review. As part of this commitment we make the peer review history of every article we publish publicly available.

When an article is published we post the peer reviewers' comments and the authors' responses online. We also post the versions of the paper that were used during peer review. These are the versions that the peer review comments apply to.

The versions of the paper that follow are the versions that were submitted during the peer review process. They are not the versions of record or the final published versions. They should not be cited or distributed as the published version of this manuscript.

BMJ Paediatrics Open is an open access journal and the full, final, typeset and author-corrected version of record of the manuscript is available on our site with no access controls, subscription charges or pay-per-view fees (<http://bmjpaedsopen.bmj.com>).

If you have any questions on BMJ Paediatrics Open's open peer review process please email [info.bmjpo@bmj.com](mailto:info.bmjpo@bmj.com)

# BMJ Paediatrics Open

## Presentation of newly diagnosed type 1 diabetes in children and young people during COVID-19 : a national UK survey

|                               |                                                                                                                                                                                                                                                                                                                                                                                                                                                                                                                                                                                                                                                                                                                                                                                                                            |
|-------------------------------|----------------------------------------------------------------------------------------------------------------------------------------------------------------------------------------------------------------------------------------------------------------------------------------------------------------------------------------------------------------------------------------------------------------------------------------------------------------------------------------------------------------------------------------------------------------------------------------------------------------------------------------------------------------------------------------------------------------------------------------------------------------------------------------------------------------------------|
| Journal:                      | <i>BMJ Paediatrics Open</i>                                                                                                                                                                                                                                                                                                                                                                                                                                                                                                                                                                                                                                                                                                                                                                                                |
| Manuscript ID                 | bmjpo-2020-000884.R1                                                                                                                                                                                                                                                                                                                                                                                                                                                                                                                                                                                                                                                                                                                                                                                                       |
| Article Type:                 | Original research letter                                                                                                                                                                                                                                                                                                                                                                                                                                                                                                                                                                                                                                                                                                                                                                                                   |
| Date Submitted by the Author: | 15-Oct-2020                                                                                                                                                                                                                                                                                                                                                                                                                                                                                                                                                                                                                                                                                                                                                                                                                |
| Complete List of Authors:     | Ng, Sze; Southport and Ormskirk Hospital NHS Trust, Paediatrics; University of Liverpool School of Life Sciences, Woodger, Katherine<br>Regan, Fiona; Wexham Park Hospital, Paediatrics<br>Soni, Astha; Sheffield Children's Hospital NHS Foundation Trust, General Medicine<br>Wright, Neil; Sheffield Children's Hospital, Paediatric Endocrinology & Diabetes<br>Agwu, Juliana; Sandwell and West Birmingham Hospitals NHS Trust, Paediatrics<br>Williams, Eleri; Hampshire Hospitals NHS Foundation Trust<br>Timmis, Alison; Countess of Chester Hospital NHS Foundation Trust<br>Kershaw, Melanie; Birmingham Children's Hospital NHS Foundation Trust<br>Moudiotis, Christopher; Royal Devon and Exeter NHS Foundation Trust, Paediatrics<br>Drew, Josephine; Nottingham University Hospitals NHS Trust, Paediatrics |
| Keywords:                     | Endocrinology, Epidemiology, Health services research                                                                                                                                                                                                                                                                                                                                                                                                                                                                                                                                                                                                                                                                                                                                                                      |
|                               |                                                                                                                                                                                                                                                                                                                                                                                                                                                                                                                                                                                                                                                                                                                                                                                                                            |

SCHOLARONE™  
Manuscripts

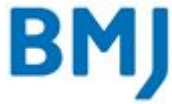

I, the Submitting Author has the right to grant and does grant on behalf of all authors of the Work (as defined in the below author licence), an exclusive licence and/or a non-exclusive licence for contributions from authors who are: i) UK Crown employees; ii) where BMJ has agreed a CC-BY licence shall apply, and/or iii) in accordance with the terms applicable for US Federal Government officers or employees acting as part of their official duties; on a worldwide, perpetual, irrevocable, royalty-free basis to BMJ Publishing Group Ltd ("BMJ") its licensees and where the relevant Journal is co-owned by BMJ to the co-owners of the Journal, to publish the Work in this journal and any other BMJ products and to exploit all rights, as set out in our [licence](#).

The Submitting Author accepts and understands that any supply made under these terms is made by BMJ to the Submitting Author unless you are acting as an employee on behalf of your employer or a postgraduate student of an affiliated institution which is paying any applicable article publishing charge ("APC") for Open Access articles. Where the Submitting Author wishes to make the Work available on an Open Access basis (and intends to pay the relevant APC), the terms of reuse of such Open Access shall be governed by a Creative Commons licence – details of these licences and which [Creative Commons](#) licence will apply to this Work are set out in our licence referred to above.

Other than as permitted in any relevant BMJ Author's Self Archiving Policies, I confirm this Work has not been accepted for publication elsewhere, is not being considered for publication elsewhere and does not duplicate material already published. I confirm all authors consent to publication of this Work and authorise the granting of this licence.

1  
2  
3 **Presentation of newly diagnosed type 1 diabetes in children and young people during**  
4 **COVID-19 : a national UK survey**  
5  
6  
7

8 SM Ng<sup>1,2</sup>, K Woodger<sup>1</sup>, F Regan<sup>3</sup>, A Soni<sup>4</sup>, N Wright<sup>4</sup>, JC Agwu<sup>5,6</sup>, E Williams<sup>7</sup>, A Timmis<sup>8</sup>,  
9 M Kershaw<sup>9</sup>, C Moudiotis<sup>10</sup>, J Drew<sup>11</sup>, On behalf of the Association of Children's Diabetes  
10 Clinicians UK  
11  
12  
13

14  
15 1 Paediatric Department, Southport and Ormskirk NHS Trust, Ormskirk, UK  
16

17 2 Department of Women's and Children's Health, University of Liverpool, Liverpool, UK  
18

19 3 Wexham Park Hospital, Slough, UK  
20

21 4 Sheffield Children's NHS Foundation Trust, Sheffield, UK  
22

23 5 Department of Paediatrics, Sandwell and West Birmingham NHS Trust, UK  
24

25 6 Institute of Clinical Sciences, College of Medicine and Dental Sciences, University of  
26 Birmingham, Birmingham, UK  
27

28 7 Hampshire Hospitals NHS Foundation Trust, Winchester, UK  
29

30 8 Countess of Chester Hospital NHS Foundation Trust, Chester, UK  
31

32 9 Birmingham Children's Hospital NHS Foundation Trust, Birmingham, UK  
33

34 10 Department of Paediatrics, Royal Devon and Exeter NHs Foundation Trust, Exeter, UK  
35

36 11 Department of Paediatrics, Nottingham University Hospitals NHS Trust, Nottingham, UK  
37

38 Correspondence to Associate Professor Sze May Ng, Paediatric Department, Southport and  
39 Ormskirk NHS Trust, Ormskirk L39 2AZ, UK [may.ng@nhs.net](mailto:may.ng@nhs.net)  
40

41 Acknowledgements  
42

43 We thank all paediatric diabetes units who have completed the survey on behalf of the  
44 Association of Children's Diabetes Clinicians (ACDC).  
45

46 Contributors  
47

48 This work was conducted on behalf of the Association of Children's Diabetes Clinicians UK  
49

50 Competing interests  
51

52 None declared.  
53  
54  
55  
56  
57  
58  
59  
60

## Abstract

In the UK, there have been reports of significant reductions in paediatric emergency attendances and visits to the general practitioners due to COVID-19. A national survey undertaken by the UK Association of Children's Diabetes Clinicians found that the proportion of new onset Type 1 Diabetes (T1D) presenting with diabetes ketoacidosis during this COVID-19 pandemic was higher than previously reported and there has been an increase in presentation of severe DKA at diagnosis in children and young people under the age of 18 years. Delayed presentations of T1D have been documented in up to 20% of units with reasons for delayed presentation ranging from fear of contracting COVID-19 to an inability to contact or access a medical provider for timely evaluation. Public health awareness and diabetes education should be disseminated to healthcare providers on the timeliness of referrals of children with T1D.

## MANUSCRIPT

Diabetes is a significant cause of morbidity and mortality in patients with COVID-19. The recent national diabetes and mortality data in England reported that adults with Type 1 (T1D) had 3.5 times the odds respectively of dying in hospital with COVID-19 compared to those without diabetes[1]. In the UK, there have been reports of significant reductions in paediatric emergency attendances due to COVID-19. The national survey undertaken by the UK Association of Children's Diabetes Clinicians aims to review the impact of COVID-19 on diabetes ketoacidosis presentations across the country.

All diabetes units caring for children and young people (CYP) in England, Wales, Scotland and Northern Ireland and those submitting data to the National Paediatric Diabetes Audit (NPDA) were invited to complete a questionnaire (via Google forms) relating to history given to the clinical teams of presentation type 1 diabetes between 1<sup>st</sup> of March 2020 to 30<sup>th</sup> of June 2020. Responses were received from 88 units, 76 from England, 10 from Wales and 2 from Northern Ireland (Table 1).

1  
2  
3 The survey showed that 450 CYP were newly diagnosed with T1D between the 1st  
4 March 2020 to 30th June 2020. The majority of centres (84%) had at least one patient  
5 admitted as newly diagnosed T1D (mean 5 cases per unit, range 0-30). 88% of centres had 1-  
6 10 DKA admissions with 71% having 1-10 severe DKA cases. Of all patients presenting as  
7 newly diagnosed T1D, 51% presented in DKA and 54% of presented with severe DKA  
8 (defined as pH <7.1). During this time period no children with T1D died as a result of DKA.  
9 In all units, 20% of newly diagnosed T1D were reported to have had a delayed presentation  
10 due to COVID-19.  
11

12 The reasons for delayed reporting of presentation were grouped into themes (Table 2).  
13 Fear of COVID-19 was reported in 40% of cases. Issues regarding the inability to access GP  
14 services as well as limited GP services with no face-to-face reviews were reported in 22% of  
15 cases, whilst 7% had issues accessing secondary care units due to advice not to attend by  
16 NHS111 or the GP. Finally, 17% of cases reported a delayed presentation due to symptoms  
17 being misdiagnosed or not recognised as diabetes such as: symptoms mistaken for a  
18 respiratory illness during a GP video consultation, tiredness due to lack of routine and  
19 increased thirst attributed to a “heat wave” by the family.  
20

21 While in non-COVID-19 times, there would be still be delays in presentation, the  
22 proportion of new onset T1D in CYP under 18 years presenting in DKA (51%) during this  
23 COVID-19 period was higher than previously reported of 38% in the UK around the same  
24 time period [2]. While in comparison, the percentage of DKA in newly diagnosed cases prior  
25 to COVID-19 had remained constant over 10 years at 26.3% in Germany[3, 4]. The  
26 proportion of those in DKA presenting as severe DKA was high at 54% while the 2017  
27 NPDA reported that 26% of newly diagnosed presented in DKA but no data was available for  
28 those presenting in severe DKA[5]. Increases in DKA and severe DKA at diagnosis in  
29 children during the COVID-19 pandemic were reported in Germany and delayed access of  
30 care provisions have been reported globally[4]. In our report, delayed presentation has been  
31 documented in 20% of units. Reasons for delayed presentation have ranged from fear of  
32 contracting COVID-19 to an inability to contact access a medical provider for timely  
33 evaluation. Limitations from this report was reliance on professional’s recall as to the number  
34 of presentations delayed due to COVID-19 and the reasons for their delay.  
35

36 The global epidemiological and clinical patterns of COVID-19 among children with  
37 diabetes are still very limited. Further emphasis should ne made on the dissemination of  
38 education to healthcare providers regarding the timeliness of referrals of children with T1D.  
39  
40  
41  
42  
43  
44  
45  
46  
47  
48  
49  
50  
51  
52  
53  
54  
55  
56  
57  
58  
59  
60

1  
2  
3 *Patient and Public Involvement-* No patients were involved directly as this was a survey  
4 undertaken by the clinical teams  
5

6 *Contributorship statement:* SMN and KW analysed the data. All authors contributed to the  
7 draft and final manuscript  
8  
9

## 10 REFERENCES

- 11
- 12
- 13
- 14 1. Barron E, Bakhai C, Kar P, A. W, Bradley D, Ismail H, Knighton P, Holma N, Khunti  
15 K, SAttar N *et al*: Type 1 and Type 2 diabetes and COVID-19 related mortality in  
16 England: a wholepopulation study. *NHS England* 2020.
- 17
- 18 2. Iyer D, Choudhary D, Agwu JC: Timeliness of referral of children with new onset  
19 type 1 diabetes. *Postgrad Med J* 2017, 93(1099):242-244.
- 20 3. Neu A, Willasch A, Eehalt S, Hub R, Ranke MB: Ketoacidosis at onset of type 1  
21 diabetes mellitus in children--frequency and clinical presentation. *Pediatric diabetes*  
22 2003, 4(2):77-81.
- 23 4. Cherubini V, Gohil A, Addala A, Zanfardino A, Iafusco D, Hannon T, Maahs DM:  
24 Unintended Consequences of COVID-19: Remember General Pediatrics. *The Journal*  
25 *of Pediatrics* 2020.
- 26 5. National Paediatric Diabetes Audit: Hospital Admissions and Complications.  
27 [https://www.rcpch.ac.uk/sites/default/files/2018-](https://www.rcpch.ac.uk/sites/default/files/2018-03/npda_hospital_admissions_report_part_2_2012-15pdf)  
28 [03/npda\\_hospital\\_admissions\\_report\\_part\\_2\\_2012-15pdf](https://www.rcpch.ac.uk/sites/default/files/2018-03/npda_hospital_admissions_report_part_2_2012-15pdf) 2017. [Accessed 15  
29 October 2020]  
30  
31  
32  
33  
34  
35  
36  
37  
38  
39  
40  
41  
42  
43  
44  
45  
46  
47  
48  
49  
50  
51  
52  
53  
54  
55  
56  
57  
58  
59  
60

**Table 1 Response to the questionnaire on newly diagnosed type 1 children or young people and diabetes ketoacidosis presentations**

|                  | <b>Number of units returning survey</b> | <b>Newly diagnosed Type 1 children or young people</b> | <b>DKA presentations</b>              | <b>Severe presentations of DKA (pH &lt;7.1)</b> | <b>Deaths</b>                         | <b>Delayed presentations due to COVID-19</b> |
|------------------|-----------------------------------------|--------------------------------------------------------|---------------------------------------|-------------------------------------------------|---------------------------------------|----------------------------------------------|
| Regions          | Total number                            | Total number (mean)                                    | Total number (% of new presentations) | Total number (% of new presentations)           | Total number (% of new presentations) | Total number (% of new presentations)        |
| England          | 76                                      | 399 (5.2)                                              | 205 (52)                              | 108 (27)                                        | 0 (0)                                 | 82 (20)                                      |
| Wales            | 10                                      | 35 (3.5)                                               | 19 (54)                               | 12 (34)                                         | 0 (0)                                 | 5 (14)                                       |
| Northern Ireland | 2                                       | 16 (8.0)                                               | 7 (44)                                | 4 (25)                                          | 0 (0)                                 | 2 (13)                                       |
| <b>Total</b>     | <b>88</b>                               | <b>450</b>                                             | <b>231 (51)</b>                       | <b>124 (28)</b>                                 | <b>0 (0)</b>                          | <b>89 (20)</b>                               |



**Table 2 Reasons for delayed presentations**

|                         | <b>Fear of Covid-19, %</b> | <b>Inability to access GP or limited GP service, %</b> | <b>Inability or discouraged to attend hospital A&amp;E or inpatient unit after contacting NHS111, %</b> | <b>Symptoms misdiagnosed or not recognised as diabetes, %</b> |
|-------------------------|----------------------------|--------------------------------------------------------|---------------------------------------------------------------------------------------------------------|---------------------------------------------------------------|
| <b>England</b>          | 36                         | 22                                                     | 5                                                                                                       | 13                                                            |
| <b>Wales</b>            | 3                          | 0                                                      | 1                                                                                                       | 4                                                             |
| <b>Northern Ireland</b> | 1                          | 0                                                      | 1                                                                                                       | 0                                                             |
| <b>Total</b>            | <b>40</b>                  | <b>22</b>                                              | <b>7</b>                                                                                                | <b>17</b>                                                     |

# BMJ Paediatrics Open

## Presentation of newly diagnosed type 1 diabetes in children and young people during COVID-19 : a national UK survey

|                               |                                                                                                                                                                                                                                                                                                                                                                                                                                                                                                                                                                                                                                                                                                                                                                                                                            |
|-------------------------------|----------------------------------------------------------------------------------------------------------------------------------------------------------------------------------------------------------------------------------------------------------------------------------------------------------------------------------------------------------------------------------------------------------------------------------------------------------------------------------------------------------------------------------------------------------------------------------------------------------------------------------------------------------------------------------------------------------------------------------------------------------------------------------------------------------------------------|
| Journal:                      | <i>BMJ Paediatrics Open</i>                                                                                                                                                                                                                                                                                                                                                                                                                                                                                                                                                                                                                                                                                                                                                                                                |
| Manuscript ID                 | bmjpo-2020-000884                                                                                                                                                                                                                                                                                                                                                                                                                                                                                                                                                                                                                                                                                                                                                                                                          |
| Article Type:                 | Original research letter                                                                                                                                                                                                                                                                                                                                                                                                                                                                                                                                                                                                                                                                                                                                                                                                   |
| Date Submitted by the Author: | 16-Sep-2020                                                                                                                                                                                                                                                                                                                                                                                                                                                                                                                                                                                                                                                                                                                                                                                                                |
| Complete List of Authors:     | Ng, Sze; Southport and Ormskirk Hospital NHS Trust, Paediatrics; University of Liverpool School of Life Sciences, Woodger, Katherine<br>Soni, Astha; Sheffield Children's Hospital NHS Foundation Trust, General Medicine<br>Timmis, Alison; Countess of Chester Hospital NHS Foundation Trust<br>Agwu, Juliana; Sandwell and West Birmingham Hospitals NHS Trust, Paediatrics<br>Regan, Fiona; Wexham Park Hospital, Paediatrics<br>Wright, Neil; Sheffield Children's Hospital, Paediatric Endocrinology & Diabetes<br>Williams, Eleri; Hampshire Hospitals NHS Foundation Trust<br>Kershaw, Melanie; Birmingham Children's Hospital NHS Foundation Trust<br>Moudiotis, Christopher; Royal Devon and Exeter NHS Foundation Trust, Paediatrics<br>Drew, Josephine; Nottingham University Hospitals NHS Trust, Paediatrics |
| Keywords:                     | Endocrinology, Epidemiology, Health services research                                                                                                                                                                                                                                                                                                                                                                                                                                                                                                                                                                                                                                                                                                                                                                      |
|                               |                                                                                                                                                                                                                                                                                                                                                                                                                                                                                                                                                                                                                                                                                                                                                                                                                            |

SCHOLARONE™  
Manuscripts



I, the Submitting Author has the right to grant and does grant on behalf of all authors of the Work (as defined in the below author licence), an exclusive licence and/or a non-exclusive licence for contributions from authors who are: i) UK Crown employees; ii) where BMJ has agreed a CC-BY licence shall apply, and/or iii) in accordance with the terms applicable for US Federal Government officers or employees acting as part of their official duties; on a worldwide, perpetual, irrevocable, royalty-free basis to BMJ Publishing Group Ltd ("BMJ") its licensees and where the relevant Journal is co-owned by BMJ to the co-owners of the Journal, to publish the Work in this journal and any other BMJ products and to exploit all rights, as set out in our [licence](#).

The Submitting Author accepts and understands that any supply made under these terms is made by BMJ to the Submitting Author unless you are acting as an employee on behalf of your employer or a postgraduate student of an affiliated institution which is paying any applicable article publishing charge ("APC") for Open Access articles. Where the Submitting Author wishes to make the Work available on an Open Access basis (and intends to pay the relevant APC), the terms of reuse of such Open Access shall be governed by a Creative Commons licence – details of these licences and which [Creative Commons](#) licence will apply to this Work are set out in our licence referred to above.

Other than as permitted in any relevant BMJ Author's Self Archiving Policies, I confirm this Work has not been accepted for publication elsewhere, is not being considered for publication elsewhere and does not duplicate material already published. I confirm all authors consent to publication of this Work and authorise the granting of this licence.

1  
2  
3 **Presentation of newly diagnosed type 1 diabetes in children and young people during**  
4 **COVID-19 : a national UK survey**  
5  
6  
7

8 SM Ng<sup>1,2</sup>, K Woodger<sup>1</sup>, F Regan<sup>3</sup>, A Soni<sup>4</sup>, N Wright<sup>4</sup>, JC Agwu<sup>5,6</sup>, E Williams<sup>7</sup>, A Timmis<sup>8</sup>,  
9 M Kershaw<sup>9</sup>, C Moudiotis<sup>10</sup>, J Drew<sup>11</sup>, On behalf of the Association of Children's Diabetes  
10 Clinicians UK  
11  
12  
13

14  
15 1 Paediatric Department, Southport and Ormskirk NHS Trust, Ormskirk, UK  
16

17 2 Department of Women's and Children's Health, University of Liverpool, Liverpool, UK  
18

19 3 Wexham Park Hospital, Slough, UK  
20

21 4 Sheffield Children's NHS Foundation Trust, Sheffield, UK  
22

23 5 Department of Paediatrics, Sandwell and West Birmingham NHS Trust, UK  
24

25 6 Institute of Clinical Sciences, College of Medicine and Dental Sciences, University of  
26 Birmingham, Birmingham, UK  
27

28 7 Hampshire Hospitals NHS Foundation Trust, Winchester, UK  
29

30 8 Countess of Chester Hospital NHS Foundation Trust, Chester, UK  
31

32 9 Birmingham Children's Hospital NHS Foundation Trust, Birmingham, UK  
33

34 10 Department of Paediatrics, Royal Devon and Exeter NHs Foundation Trust, Exeter, UK  
35

36 11 Department of Paediatrics, Nottingham University Hospitals NHS Trust, Nottingham, UK  
37

38 Correspondence to Associate Professor Sze May Ng, Paediatric Department, Southport and  
39 Ormskirk NHS Trust, Ormskirk L39 2AZ, UK [may.ng@nhs.net](mailto:may.ng@nhs.net)  
40

41 Acknowledgements  
42

43 We thank all paediatric diabetes units who have completed the survey on behalf of the  
44 Association of Children's Diabetes Clinicians (ACDC).  
45

46 Contributors  
47

48 This work was conducted on behalf of the Association of Children's Diabetes Clinicians UK  
49

50 Competing interests  
51

52 None declared.  
53  
54  
55  
56  
57  
58  
59  
60

## Abstract

In the UK, there have been reports of significant reductions in paediatric emergency attendances and visits to the general practitioners due to COVID-19. A national survey undertaken by the UK Association of Children's Diabetes Clinicians found that the proportion of new onset Type 1 Diabetes presenting in diabetes ketoacidosis during this COVID-19 pandemic was higher than previously reported and there has been an increase in presentation of severe DKA at diagnosis in children and young people under the age of 18 years. Delayed presentations were documented in 20% of units with reasons for delayed presentation ranging from fear of contracting COVID-19 to an inability to contact access a medical provider for timely evaluation. Public health awareness and diabetes education should be disseminated to healthcare providers on the timeliness of referrals of children with T1D.

## MANUSCRIPT

Diabetes is a significant risk of morbidity and mortality in patients with COVID-19. The recent national diabetes and mortality data in England reported that people with Type 1 (T1D) had 3.5 times the odds respectively of dying in hospital with COVID-19 compared to those without diabetes[1]. In the UK, there have been reports of significant reductions in paediatric emergency attendances due to COVID-19. The national survey undertaken by the UK Association of Children's Diabetes Clinicians aims to review the impact of COVID-19 on diabetes ketoacidosis presentations across the country.

All diabetes units caring for children and young people (CYP) in England, Wales, Scotland and Northern Ireland and those submitting data to the National Paediatric Diabetes Audit (NPDA) were invited to complete a questionnaire (via Google forms) relating to history given of presentation type 1 diabetes between 1<sup>st</sup> March to 30<sup>th</sup> June 2020. Responses were received from 88 units, 76 from England, 10 from Wales and 2 from Northern Ireland (Table 1).

1  
2  
3 The survey showed that 450 CYP were newly diagnosed with T1D between the 1st  
4 March 2020 to 30th June 2020. The majority of centres (84%) had at least one patient  
5 admitted as newly diagnosed T1D (mean 5 cases per unit, range 0-30). 88% of centres had 1-  
6 10 DKA admissions with 71% having 1-10 severe DKA cases. Of all patients presenting as  
7 newly diagnosed T1D, 51% presented in DKA and 54% of presented with severe DKA  
8 (defined as pH <7.1). During this time period no children with T1D died as a result of DKA.  
9 In all units, 20% of newly diagnosed T1D were reported to have had a delayed presentation  
10 due to COVID-19.  
11

12  
13  
14  
15  
16  
17 Reasons for delayed presentation were grouped into themes (Table 2). Fear of  
18 COVID-19 was reported in 40% of cases. Issues regarding the inability to access GP services  
19 and limited GP services with no face-to-face reviews were reported in 22% of cases whilst  
20 7% had issues accessing secondary care units due to advice not to attend by NHS11 or the  
21 GP. 17% of cases reported a delayed presentation due to symptoms being misdiagnosed or  
22 not recognised as diabetes such as “symptoms mistaken for a respiratory illness on GP video  
23 consultation and “tiredness due to lack of routine and increased thirst attributed to heat wave  
24 by family”  
25

26  
27  
28  
29  
30  
31 The proportion of new onset T1D in CYP under 18 years presenting in DKA (51%)  
32 during this COVID-19 period was higher than previously reported of 38% in the UK around  
33 the same time period [2]. While in comparison, the percentage of DKA in newly diagnosed  
34 cases prior to COVID-19 had remained constant over 10 years at 26.3% in Germany[3]. The  
35 proportion of those in DKA presenting as severe DKA was high at 54% while the 2017  
36 NPDA reported that 26% of newly diagnosed presented in DKA but no data was available for  
37 those presenting in severe DKA[4]. Increases in DKA and severe DKA at diagnosis in  
38 children during the COVID-19 pandemic were reported in Germany and delayed access of  
39 care provisions have been reported globally[5]. In our report, delayed presentation has been  
40 documented in 20% of units. Reasons for delayed presentation have ranged from fear of  
41 contracting COVID-19 to an inability to contact access a medical provider for timely  
42 evaluation. Limitations from this report was reliance on professional’s recall as to the number  
43 of presentations delayed due to COVID-19 and the reasons for their delay.  
44

45  
46  
47  
48  
49  
50  
51  
52  
53 The global epidemiological and clinical patterns of COVID-19 among children with  
54 diabetes are still very limited. Further emphasis and education should be disseminated to  
55 healthcare providers on the timeliness of referrals of children with T1D.  
56  
57  
58  
59  
60

1  
2  
3 *Patient and Public Involvement-* No patients were involved directly as this was a survey  
4 undertaken by the clinical teams  
5

6 *Contributorship statement:* SMN and KW analysed the data. All authors contributed to the  
7 draft and final manuscript  
8  
9

## 10 REFERENCES

- 11  
12  
13  
14 1. Barron E, Bakhai C, Kar P, A. W, Bradley D, Ismail H, Knighton P, Holma N, Khunti  
15 K, SAttar N *et al*: Type 1 and Type 2 diabetes and COVID-19 related mortality in  
16 England: a wholepopulation study. *NHS England* 2020.
- 17  
18 2. Iyer D, Choudhary D, Agwu JC: Timeliness of referral of children with new onset  
19 type 1 diabetes. *Postgrad Med J* 2017, 93(1099):242-244.
- 20  
21 3. Neu A, Willasch A, Eehalt S, Hub R, Ranke MB: Ketoacidosis at onset of type 1  
22 diabetes mellitus in children--frequency and clinical presentation. *Pediatric diabetes*  
23 2003, 4(2):77-81.
- 24  
25 4. National Paediatric Diabetes Audit 2017: Hospital Admissions and Complications.  
26 Accessed 20 August 2020 [https://www.rcpch.ac.uk/sites/default/files/2018-](https://www.rcpch.ac.uk/sites/default/files/2018-03/npda_hospital_admissions_report_part_2_2012-15pdf)  
27 [03/npda\\_hospital\\_admissions\\_report\\_part\\_2\\_2012-15pdf](https://www.rcpch.ac.uk/sites/default/files/2018-03/npda_hospital_admissions_report_part_2_2012-15pdf).
- 28  
29 5. Cherubini V, Gohil A, Addala A, Zanfardino A, Iafusco D, Hannon T, Maahs DM:  
30 Unintended Consequences of COVID-19: Remember General Pediatrics. *The Journal*  
31 *of Pediatrics* 2020.  
32  
33  
34  
35  
36  
37  
38  
39  
40  
41  
42  
43  
44  
45  
46  
47  
48  
49  
50  
51  
52  
53  
54  
55  
56  
57  
58  
59  
60

**Table 1 Response to the questionnaire on newly diagnosed type 1 children or young people and diabetes ketoacidosis presentations**

|                  | <b>Number of units returning survey</b> | <b>Newly diagnosed Type 1 children or young people</b> | <b>DKA presentations</b>              | <b>Severe presentations of DKA (pH &lt;7.1)</b> | <b>Deaths</b>                         | <b>Delayed presentations due to COVID-19</b> |
|------------------|-----------------------------------------|--------------------------------------------------------|---------------------------------------|-------------------------------------------------|---------------------------------------|----------------------------------------------|
| Regions          | Total number                            | Total number (mean)                                    | Total number (% of new presentations) | Total number (% of new presentations)           | Total number (% of new presentations) | Total number (% of new presentations)        |
| England          | 76                                      | 399 (5.2)                                              | 205 (52)                              | 108 (27)                                        | 0 (0)                                 | 82 (20)                                      |
| Wales            | 10                                      | 35 (3.5)                                               | 19 (54)                               | 12 (34)                                         | 0 (0)                                 | 5 (14)                                       |
| Northern Ireland | 2                                       | 16 (8.0)                                               | 7 (44)                                | 4 (25)                                          | 0 (0)                                 | 2 (13)                                       |
| <b>Total</b>     | <b>88</b>                               | <b>450</b>                                             | <b>231 (51)</b>                       | <b>124 (28)</b>                                 | <b>0 (0)</b>                          | <b>89 (20)</b>                               |



1  
2  
3  
4  
5  
6  
7  
8  
9  
10  
11  
12  
13  
14  
15  
16  
17  
18  
19  
20  
21  
22  
23  
24  
25  
26  
27  
28  
29  
30  
31  
32  
33  
34  
35  
36  
37  
38  
39  
40  
41  
42  
43  
44  
45  
46

**Table 2 Reasons for delayed presentations**

|                         | <b>Fear of Covid19, %</b> | <b>Inability to access GP or limited GP service, %</b> | <b>Inability or discouraged to attend hospital A&amp;E or inpatient unit after contacting NHS111, %</b> | <b>Symptoms misdiagnosed or not recognised as diabetes, %</b> |
|-------------------------|---------------------------|--------------------------------------------------------|---------------------------------------------------------------------------------------------------------|---------------------------------------------------------------|
| <b>England</b>          | 35                        | 22                                                     | 5                                                                                                       | 13                                                            |
| <b>Wales</b>            | 3                         | 0                                                      | 1                                                                                                       | 5                                                             |
| <b>Northern Ireland</b> | 1                         | 0                                                      | 1                                                                                                       | 0                                                             |
| <b>Total</b>            | 40                        | 22                                                     | 7                                                                                                       | 17                                                            |

Confidential: For Review Only
