# Supplementary material for: Presentation of newly diagnosed type 1 diabetes in children and young people during COVID-19: a national UK survey
Source: PubMed Central journal article supplement — BMJ Paediatr Open. 2020 Nov 2;4(1):e000884. doi: 10.1136/bmjpo-2020-000884 (PMC7607512; doi:10.1136/bmjpo-2020-000884), 2020-11-02
Supplement: bmjpo-2020-000884.reviewer_comments.pdf [file bmjpo-2020-000884.reviewer_comments.pdf]

## PEER REVIEW HISTORY

BMJ Paediatrics Open publishes all reviews undertaken for accepted manuscripts. Reviewers are asked to complete a checklist review form and are provided with free text boxes to elaborate on their assessment. These free text comments are reproduced below.

### ARTICLE DETAILS

|                            |                                                                                                                                                                                                               |
|----------------------------|---------------------------------------------------------------------------------------------------------------------------------------------------------------------------------------------------------------|
| <b>TITLE (PROVISIONAL)</b> | Presentation of newly diagnosed type 1 diabetes in children and young people during COVID-19 : a national UK survey                                                                                           |
| <b>AUTHORS</b>             | Ng, Sze May<br>Woodger, Katherine<br>Regan, Fiona<br>Soni, Astha<br>Wright, Neil<br>Agwu, Juliana Chizo<br>Williams, Eleri<br>Timmis, Alison<br>Kershaw, Melanie<br>Moudiotis, Christopher<br>Drew, Josephine |

### VERSION 1 – REVIEW

|                        |                                                                                                                                                                                                                       |
|------------------------|-----------------------------------------------------------------------------------------------------------------------------------------------------------------------------------------------------------------------|
| <b>REVIEWER</b>        | Reviewer name:<br>Institution and Country: Blackpool Teaching Hospitals NHS Foundation Trust, Whinney Heys Road, Blackpool FY3 8NR, United Kingdom of Great Britain and Northern Ireland<br>Competing interests: None |
| <b>REVIEW RETURNED</b> | 23-Sep-2020                                                                                                                                                                                                           |

|                         |  |
|-------------------------|--|
| <b>GENERAL COMMENTS</b> |  |
|-------------------------|--|

### VERSION 1 – AUTHOR RESPONSE

Abstract: 2nd sentence line 4 to read: Type1 Diabetes presenting with ( not in ) diabetic ketoacidosis.

2nd paragraph: Diabetes is a significant cause ( not risk ) of morbidity and mortality.

4th paragraph: between 1st march 2020 and 30th June 2020.

5th paragraph: The reasons for delayed reporting of presentation were grouped into themes.issues regarding the inability to access GP services as well as limited GP services with no face-to-face reviews, were reported in 22% cases.

NHS11 should read NHS111.Finally 17% cases reported delayed presentation due to symptoms misdiagnosed or not recognised as diabetes such as symptoms mistaken for a respiratory illness during ( not on ) a GP video consultation.

Tiredness due to a lack of routine and increased thirst attributed to a heat-wave by the family.

6th paragraph: The proportion of new-onset T1D in CYP under 18 years presenting in DKA ( 51% ) during this COVID-19 period was higher than the previously reported 38% in the UK around the aforementioned period.

In comparison ( While not needed in the beginning of sentence ).

Reference 3 from Germany was published in 2003 : need a recent reference

Reasons for delayed presentation ranged from fear of contracting COVID-19 to inability to access a medical provider ( it reads to contact access )

Last paragraph : The global epidemiological and clinical patterns of COVID-19 among children are still very limited. Further emphasis should be made on the dissemination of education to healthcare providers regarding the timeliness of referrals of children with T1D.

## VERSION 2 – REVIEW

|                         |                                                                                                                                                                                                                             |
|-------------------------|-----------------------------------------------------------------------------------------------------------------------------------------------------------------------------------------------------------------------------|
| <b>REVIEWER</b>         | Reviewer name:<br>Institution and Country: Blackpool Teaching Hospitals NHS<br>Foundation Trust, Whinney Heys Road, Blackpool<br>FY3 8NR, United Kingdom of Great Britain and Northern Ireland<br>Competing interests: None |
| <b>REVIEW RETURNED</b>  | 21-Oct-2020                                                                                                                                                                                                                 |
| <b>GENERAL COMMENTS</b> |                                                                                                                                                                                                                             |

## VERSION 2 – AUTHOR RESPONSE

Very good research article in current scenario. I suggested some minor changes to your initial submission. I am now happy with the content for publication.
